# Supplementary material
Source: HighWire-hosted journal article supplement (https://gut.bmj.com/content/70/10/1872)

**Supplementary Figure 10.** The protective effect of bacterial OGAs against DSS colitis when administrated at different time points. (A, F) Schematic outline of the DSS-colitis model and the treatment approach of BtGH84 (A) and AkkGH84 (F). (B-E, G-J) Disease severity of DSS-colitis mice: body weight change (B, G), colon length (C, H); histology manifestation on H&E staining (D, I), scale bar: 200  $\mu$ m and inflammation score (E, J). Data represent the mean of three repeats per group with the SD; \*  $P < 0.05$ , \*\*  $P < 0.01$ , \*\*\*  $P < 0.001$ .

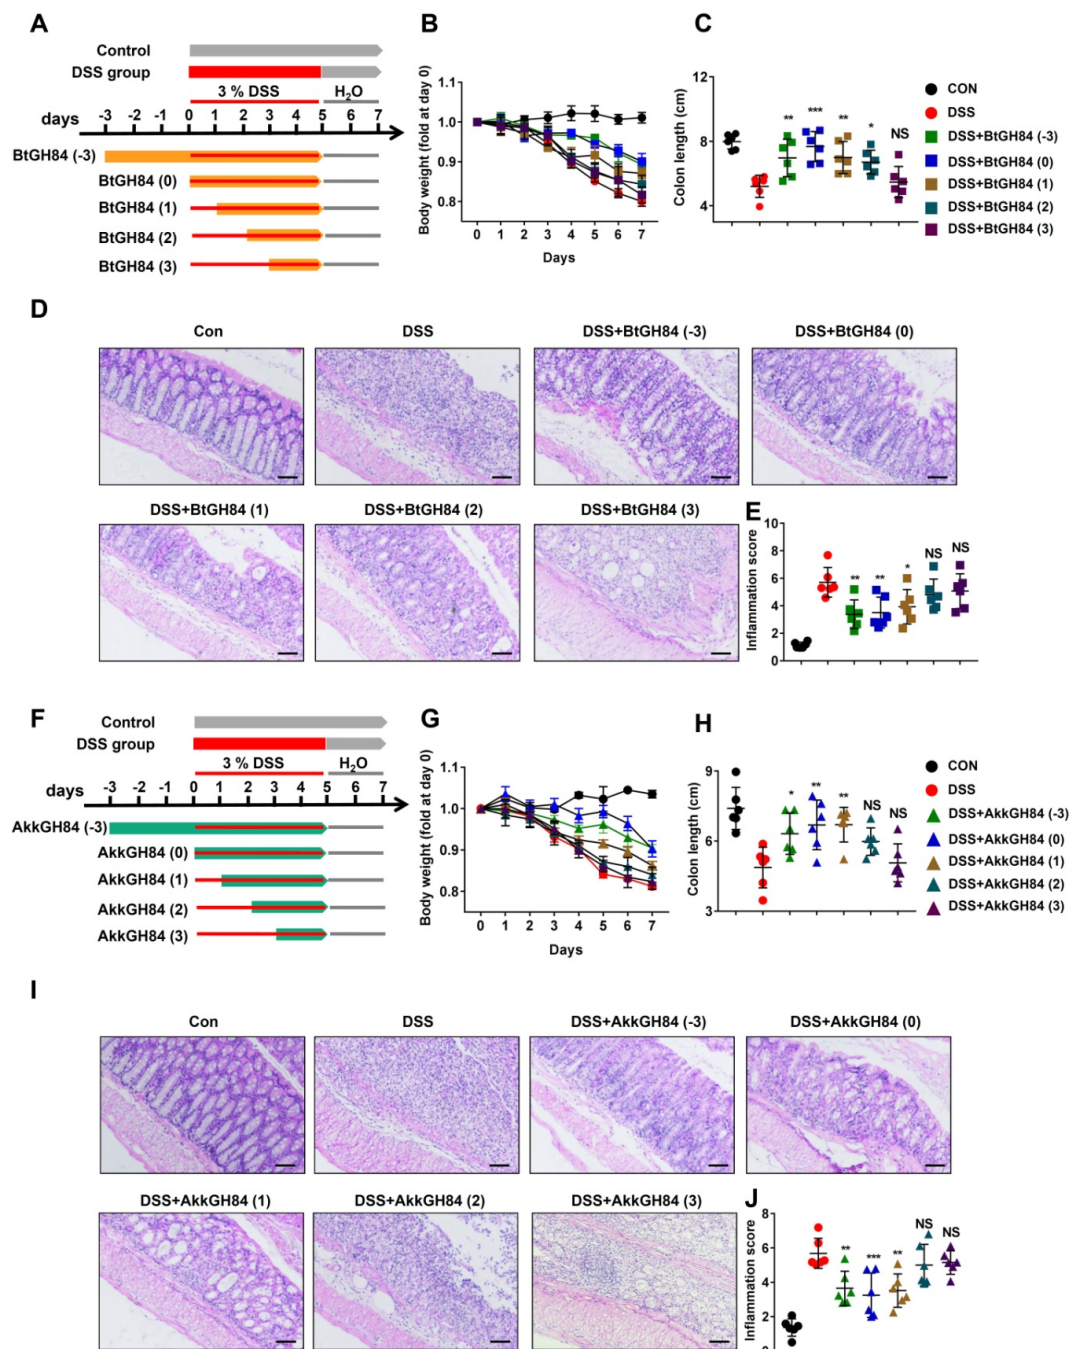

Supplement: inline-supplementary-material-12 [file inline-supplementary-material-12.pdf]
