# Supplementary material
Source: HighWire-hosted journal article supplement (https://gut.bmj.com/content/70/10/1872)

**Supplementary Figure 12.** Bacterial OGAs protects mice against DSS-induced colitis by hydrolyzing O-GlcNAcylated proteins in colonic tissue. **(A)** Schematic outline of the DSS-colitis model and the treatment approach. **(B)** Immunoblot analysis of O-GlcNAc levels in colonic tissue lysates of DSS-treated mice receiving OGAs or Thiamet G (a selective OGA inhibitor). **(C-F)** Disease severity of DSS-colitis mice treated with OGAs or Thiamet G: body weight change **(C)**, histology manifestation on H&E staining **(D)**, scale bar: 200  $\mu\text{m}$ , colon length **(E)** and inflammation score **(F)**. **(G-J)** Proinflammatory cytokines in colonic tissue lysates. Data represent the mean of three repeats per group with the SD; \* $P < 0.05$ , \*\* $P < 0.01$ , \*\*\* $P < 0.001$ .

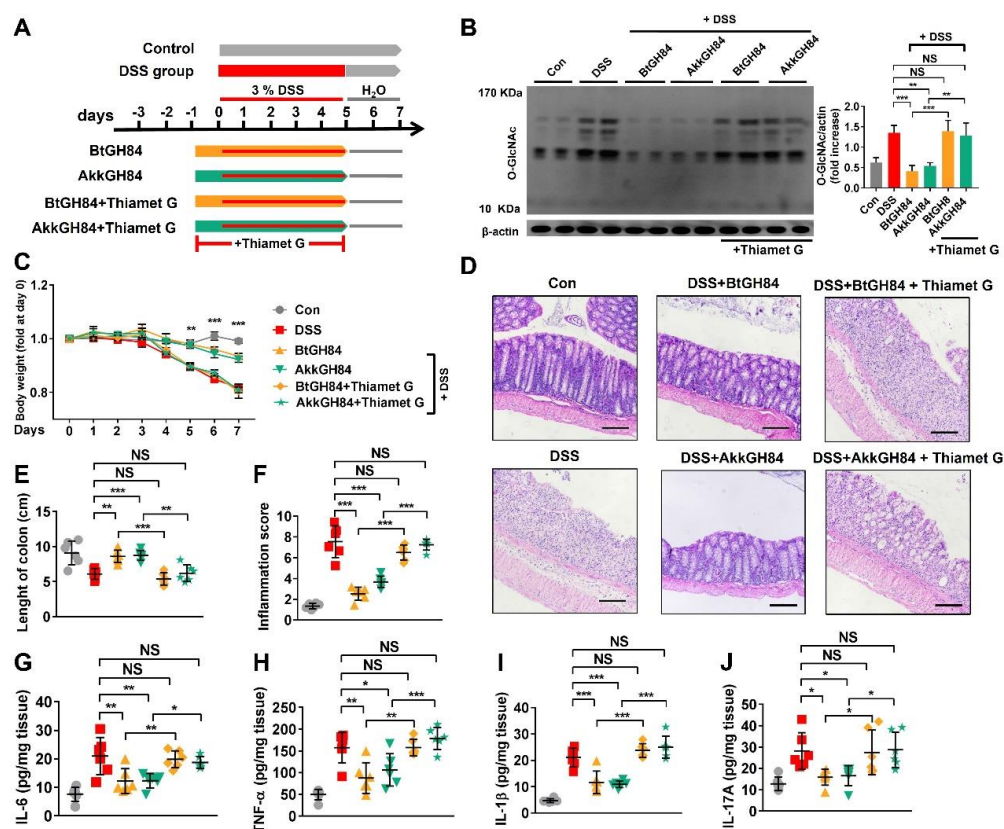

Supplement: inline-supplementary-material-14 [file inline-supplementary-material-14.pdf]
